# Supplementary material
Source: PubMed Central journal article supplement (PMC10790417)
Supplement: NIHMS1951619-supplement-Supplemental_Data.pdf [file NIHMS1951619-supplement-Supplemental_Data.pdf]

**Supplemental Figure 1. Differentially expressed genes related to extracellular matrix degradation, inflammation, and cartilage development in mini-pig TMJ injury, related to Figure 1.**

**a. Over Representation of Cartilage Injury versus Healthy Cartilage for Molecular Functions**

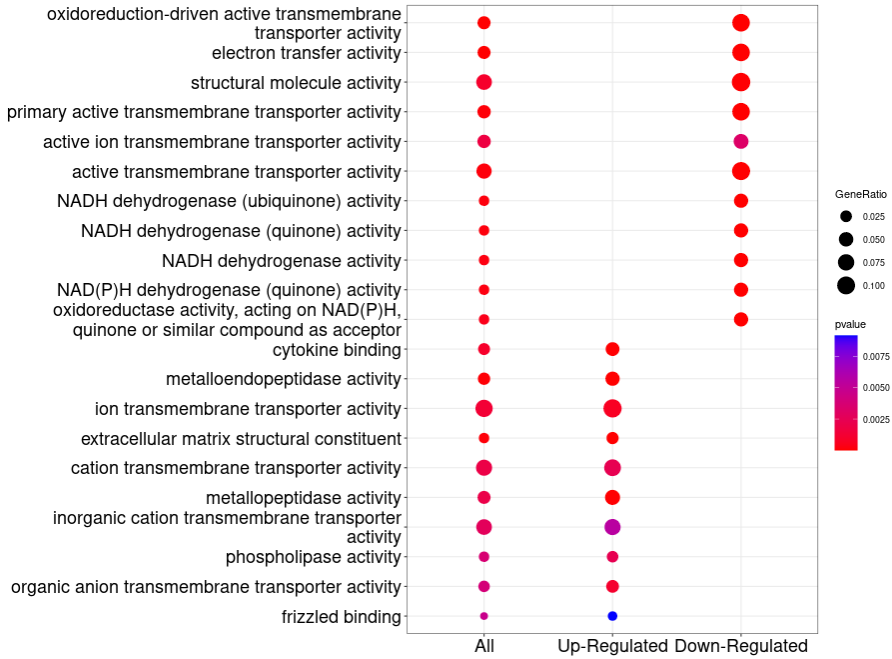

**b. Extracellular Matrix Degradation & Inflammation**

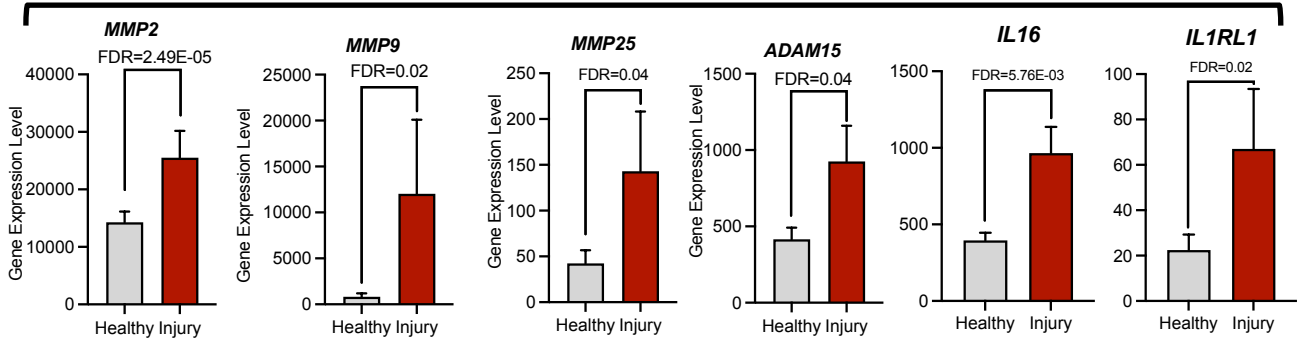

**c. Articular Cartilage Development**

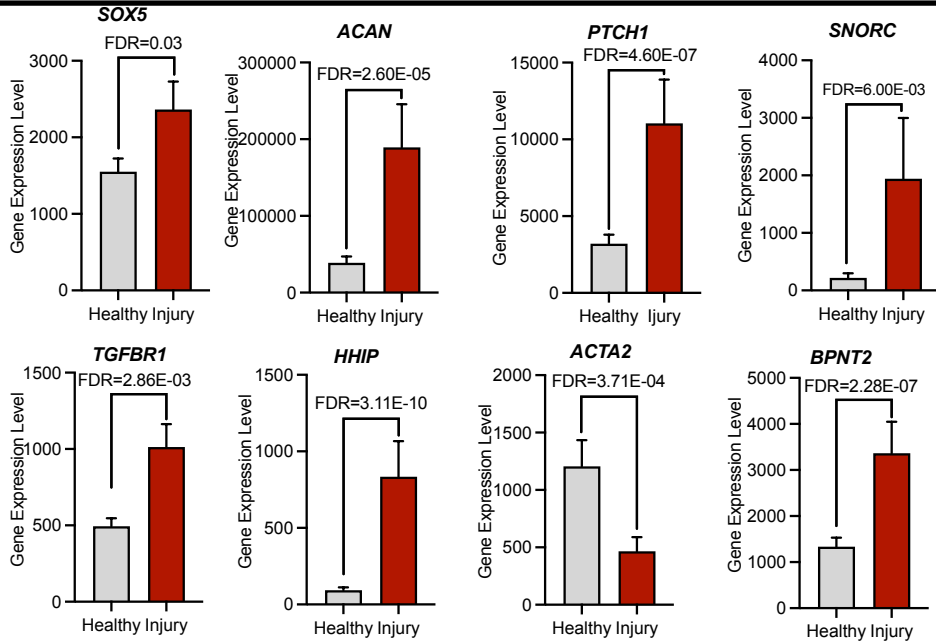

**Supplemental Figure 1. Differentially expressed genes related to extracellular matrix degradation, inflammation, and cartilage development in mini-pig TMJ injury, related to**

**Figure 1.** (a) Dot plot of GO terms of molecular functions in injured vs uninjured mini-pig condyles from bulk RNAseq analysis. (b-c) Relative gene expression levels of selected extracellular degradation and inflammation genes (b) and cartilage development genes (c) determined from GO enrichment analyses.

**Supplemental Figure 2. Differentially expressed genes associated with osteoblast differentiation, bone mineralization, and Wnt signaling in mini-pig TMJ injury, related to Figure 1**

**a.**

**Osteoblast Differentiation & Bone Mineralization/Ossification**

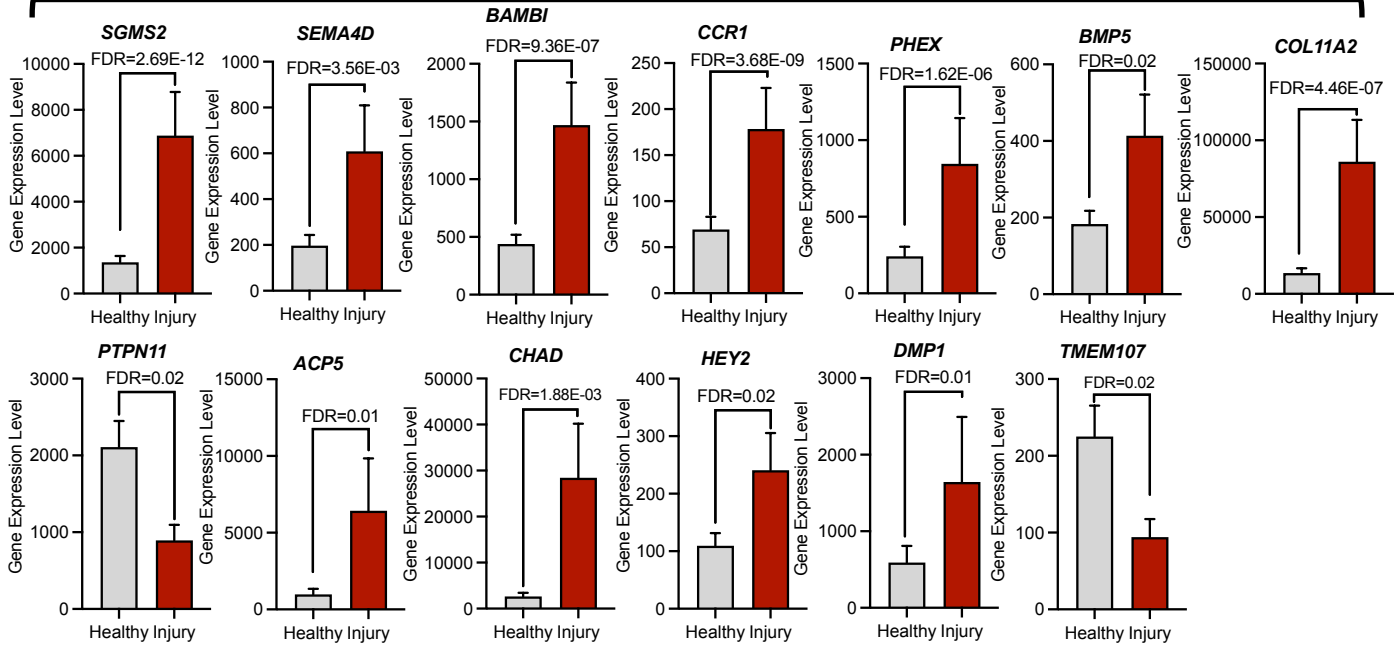

**b.**

**Wnt Signaling Pathway**

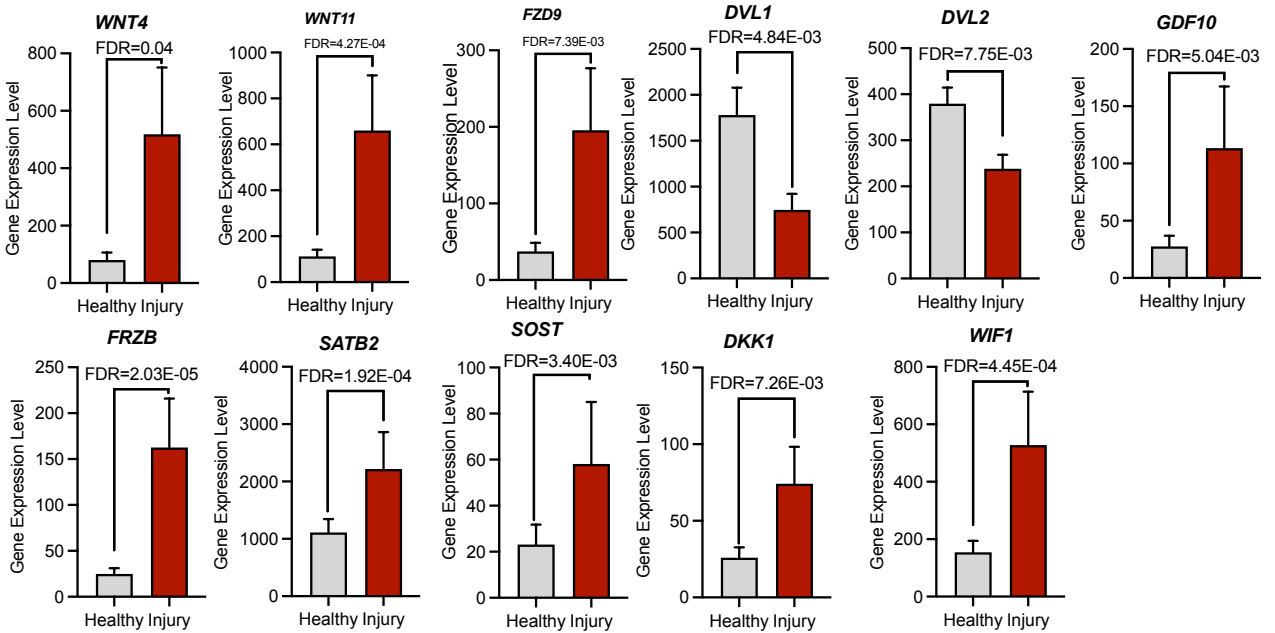

**Supplemental Figure 2. Differentially expressed genes associated with osteoblast differentiation, bone mineralization, and Wnt signaling in mini-pig TMJ injury, related to Figure 1. (a-b)** Relative gene expression levels of selected osteoblast differentiation and bone mineralization/ossification (**a**) and Wnt signaling pathway (**b**) determined from GO enrichment analyses in bulk RNAseq.



# Supplemental Figure 3. WNT3a induces loss of chondrocyte identity and osteoblast-like properties in condylar chondrocytes but not in perichondrial cells *in vitro*, related to Figure 1.

## Mini-Pig Condylar Chondrocyte Pellet Cultures

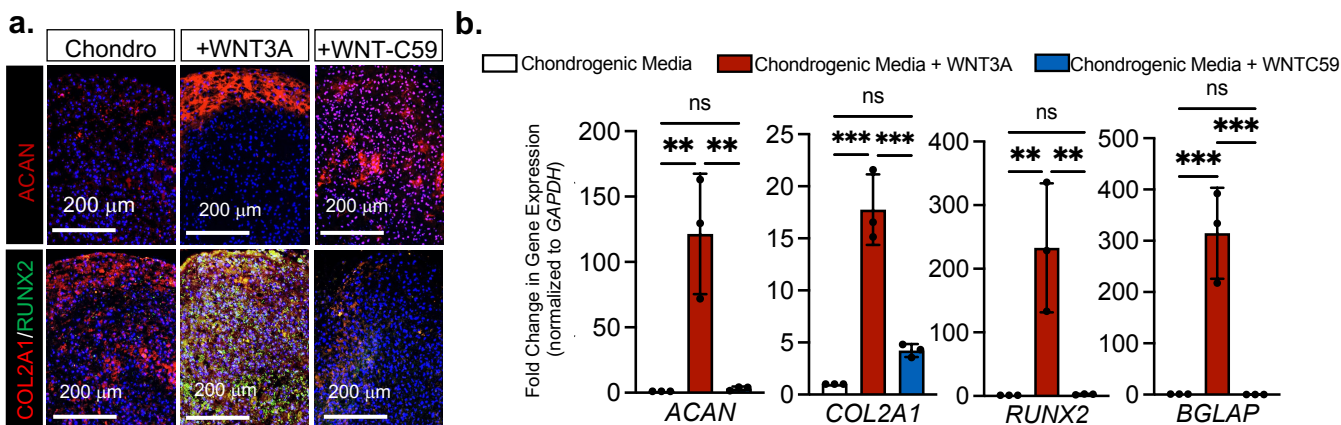

## Mini-Pig Condylar Chondrocyte Osteogenic Differentiation

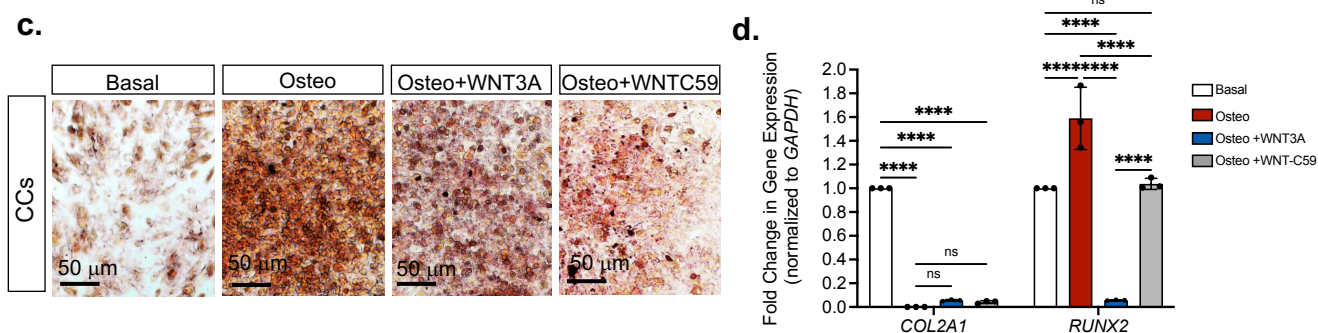

## Mini-Pig Perichondrial Cell Pellet Cultures

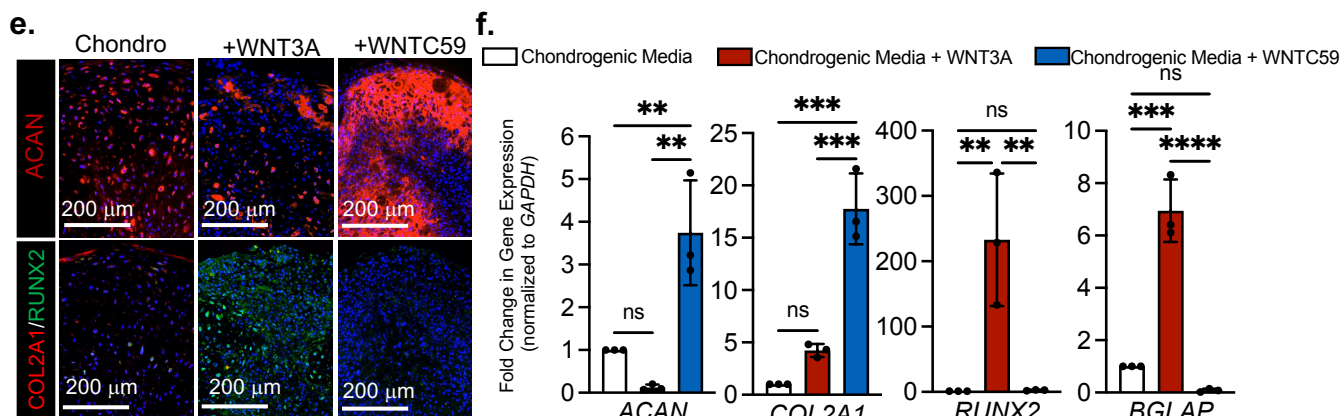

## Mini-Pig Perichondrial Cell Osteogenic Differentiation

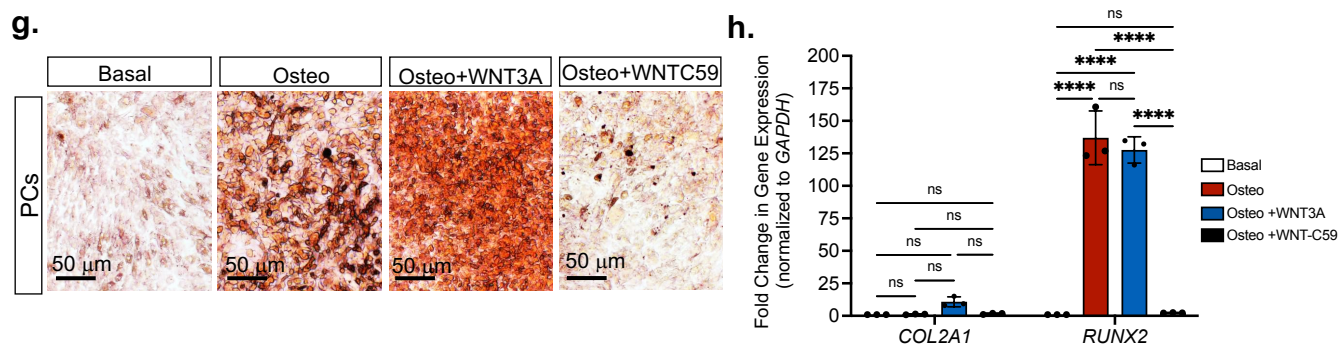

**Supplemental Figure 3. WNT3a induces loss of chondrocyte identity and osteoblast-like properties in condylar chondrocytes but not in perichondrial cells *in vitro*, related to**

**Figure 1.** (a) Representative immunohistochemistry staining of aggrecan (ACAN), type II collagen (COL2A1), and RUNX2 in mini-pig condylar chondrocyte pellet cultures in chondrogenic media (chondro) with WNT3a or WNT-C59. (b) qRT-PCR of *ACAN*, *COL2A1*, *RUNX2*, *BGLAP* gene expression in mini-pig condylar chondrocyte pellet cultures. Data presented are mean fold change in gene expression  $\pm$  SD normalized to GAPDH. \*\* $p \leq 0.01$ , \*\*\* $p \leq 0.001$ ; one-way ANOVA followed by Tukey's post hoc; n=3 pellets. (c) Alizarin red staining of mini-pig condylar chondrocytes (CCs) cultured in basal media, osteogenic media, and osteogenic media with WNT3A or WNT-C59. (d) qRT-PCR of *COL2A1* and *RUNX2* gene expression in mini-pig condylar chondrocytes. Data presented are mean fold change in gene expression  $\pm$  SD normalized to GAPDH. \*\*\*\* $p \leq 0.0001$ ; two-way ANOVA followed by Tukey's post hoc; n=3 experiments. (e) Representative immunohistochemistry staining of aggrecan (ACAN), type II collagen (COL2A1), and RUNX2 in mini-pig perichondrial cell pellet cultures in chondrogenic media (chondro) with WNT3a or WNT-C59. (f) qRT-PCR of *ACAN*, *COL2A1*, *RUNX2*, *BGLAP* gene expression in mini-pig perichondrial cell pellet cultures. Data presented are mean fold change in gene expression  $\pm$  SD normalized to GAPDH. \*\* $p \leq 0.01$ , \*\*\* $p \leq 0.001$ ; one-way ANOVA followed by Tukey's post hoc; n=3 pellets. (g) Alizarin red staining of mini-pig perichondrial cells (PCs) cultured in basal media, osteogenic media, and osteogenic media with WNT3A or WNT-C59. (h) qRT-PCR of *COL2A1* and *RUNX2* gene expression in mini-pig perichondrial cells. Data presented are mean fold change in gene expression  $\pm$  SD normalized to GAPDH. \*\*\*\* $p \leq 0.0001$ ; two-way ANOVA followed by Tukey's post hoc; n=3 experiments



**Supplemental Figure 4. *Lgr5*-expressing cells are enriched in the outer superficial zone of the perichondrium and differ from chondroprogenitor cells and chondrocytes, related to Figure 2.**

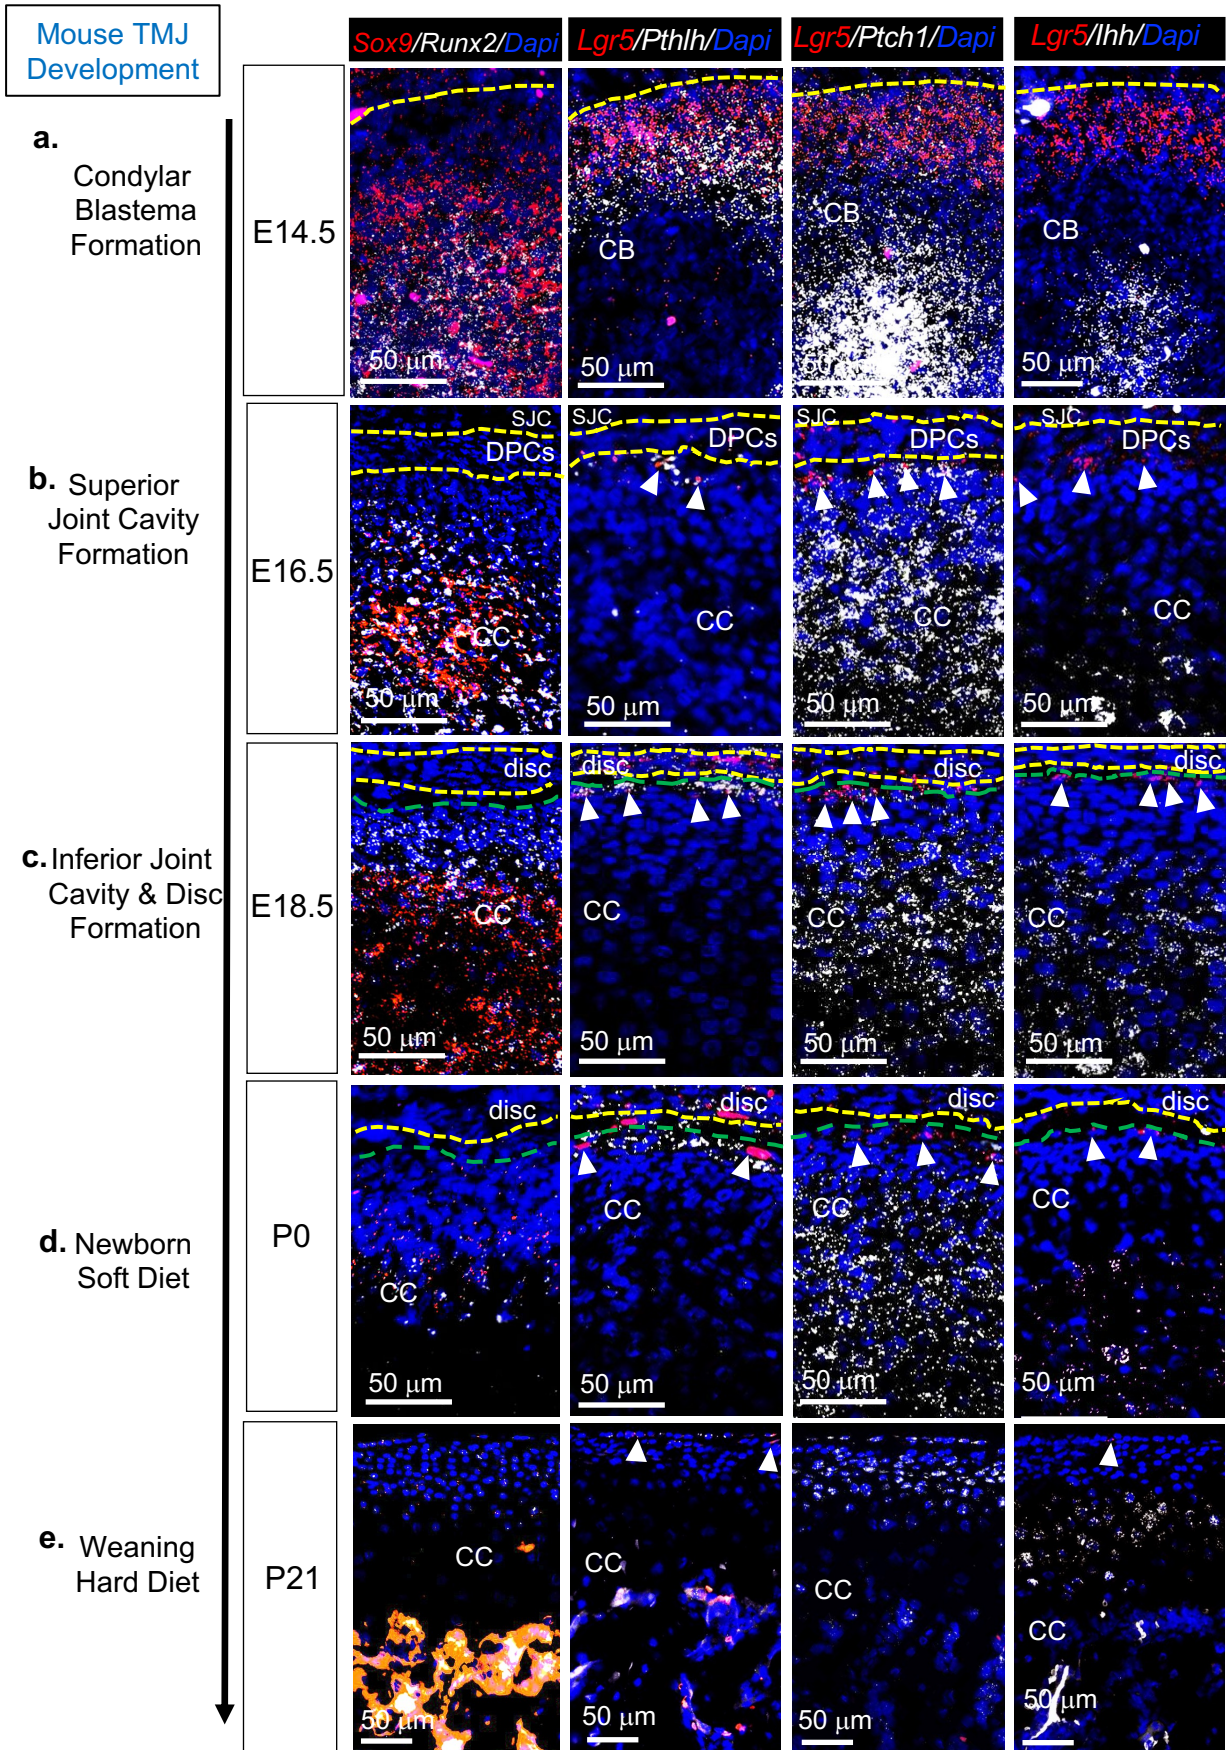

**Supplemental Figure 4. *Lgr5*-expressing cells are enriched in the outer superficial zone of the perichondrium and differ from chondroprogenitor cells and chondrocytes, related to Figure 2.**

**(a-e)** *in situ* hybridization of *Sox9*, *Runx2*, *Lgr5*, *Pthlh*, *Ptch1*, and *Ihh* in mice during temporomandibular joint morphogenesis at **(a)** E14.5 (condylar blastema formation); **(b)** E16.5 (superior joint cavity formation); **(c)** E18.5 (inferior joint cavity formation); **(d)** P0 (newborn and jaw function); **(e)** P21 (weaning and switch to hard diet). CB=condylar blastema;

SJC=superior joint cavity, CC= condylar cartilage, DPC=disc progenitor cells.



**Supplemental Figure 5. *Lgr5*-expressing cells are localized to the outer superficial zone of the perichondrium, are not highly proliferative, and supply progeny to disc, perichondrium, periosteum and bone, related to Figures 2-3.**

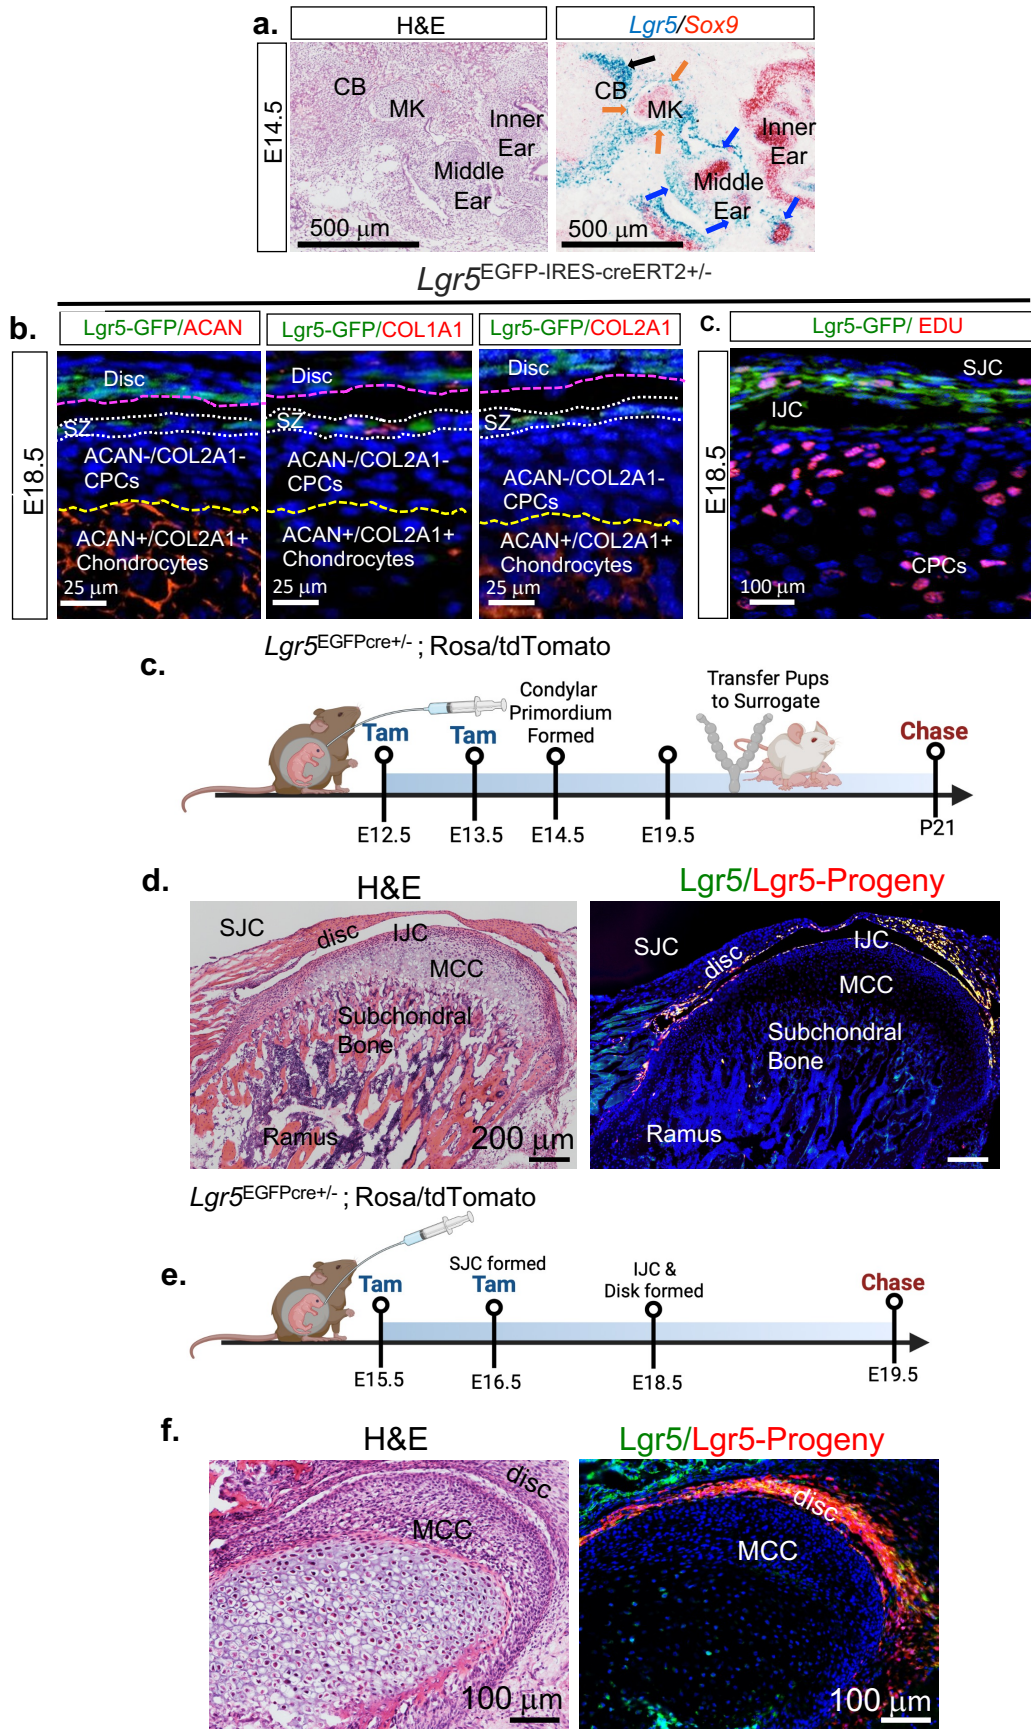

**Supplemental Figure 5. *Lgr5*-expressing cells are localized to the outer superficial zone of the perichondrium, are not highly proliferative, and supply progeny to TMJ disc, perichondrium, periosteum and bone, related to Figures 2-3.** (a) *in situ* hybridization of *Lgr5* (blue) surrounding Meckel's cartilage, condylar blastema and middle ear in the mouse head at E14.5. CB=condylar blastema, MK=Meckel's cartilage. (b) Immunohistochemistry of aggrecan (ACAN), type II collagen (COL2A1), and type I collagen (COL1A1) of mandibular condyles from *Lgr5*<sup>EGFPcre+/-</sup> mice at E18.5. SZ=superficial zone, CPCs=chondroprogenitor cells, IJC=inferior joint cavity (IJC), CC= condylar cartilage. (c) EDU staining (red) in E18.5 *Lgr5*<sup>EGFPcre+/-</sup> mouse following a 4-hour pulse. SJC=superior joint cavity, IJC=inferior joint cavity. (c) Schematic of lineage tracing experiments and tamoxifen-induced recombination in *Lgr5*<sup>EGFPcre+/-</sup>; *Rosa/tdTomato* mice. Tamoxifen was administered daily at E12.5-E13.5 and *Lgr5*-progeny were evaluated at P21. To ensure pup survival, a cesarian was performed and pups were transferred to a CD1 surrogate dam. (d) H&E and fluorescent images of pups from a. SJC=superior joint cavity (SJC), MCC=mandibular condylar cartilage, IJC=inferior joint cavity (IJC). Scale= 200µM. (c) Schematic of lineage tracing experiment and tamoxifen-induced recombination in *Lgr5*<sup>EGFPcre+/-</sup>; *Rosa/tdTomato* mice. (e) H&E and fluorescent images of *Lgr5*-progeny (red) & *Lgr5* (green) at E19.5. SJC=superior joint cavity (SJC), MCC=mandibular\_condylar cartilage, IJC=inferior joint cavity (IJC).



**Supplemental Figure 6. Ablation of *Lgr5*-expressing cells disrupts jaw joint morphogenesis, related to Figure 4.**

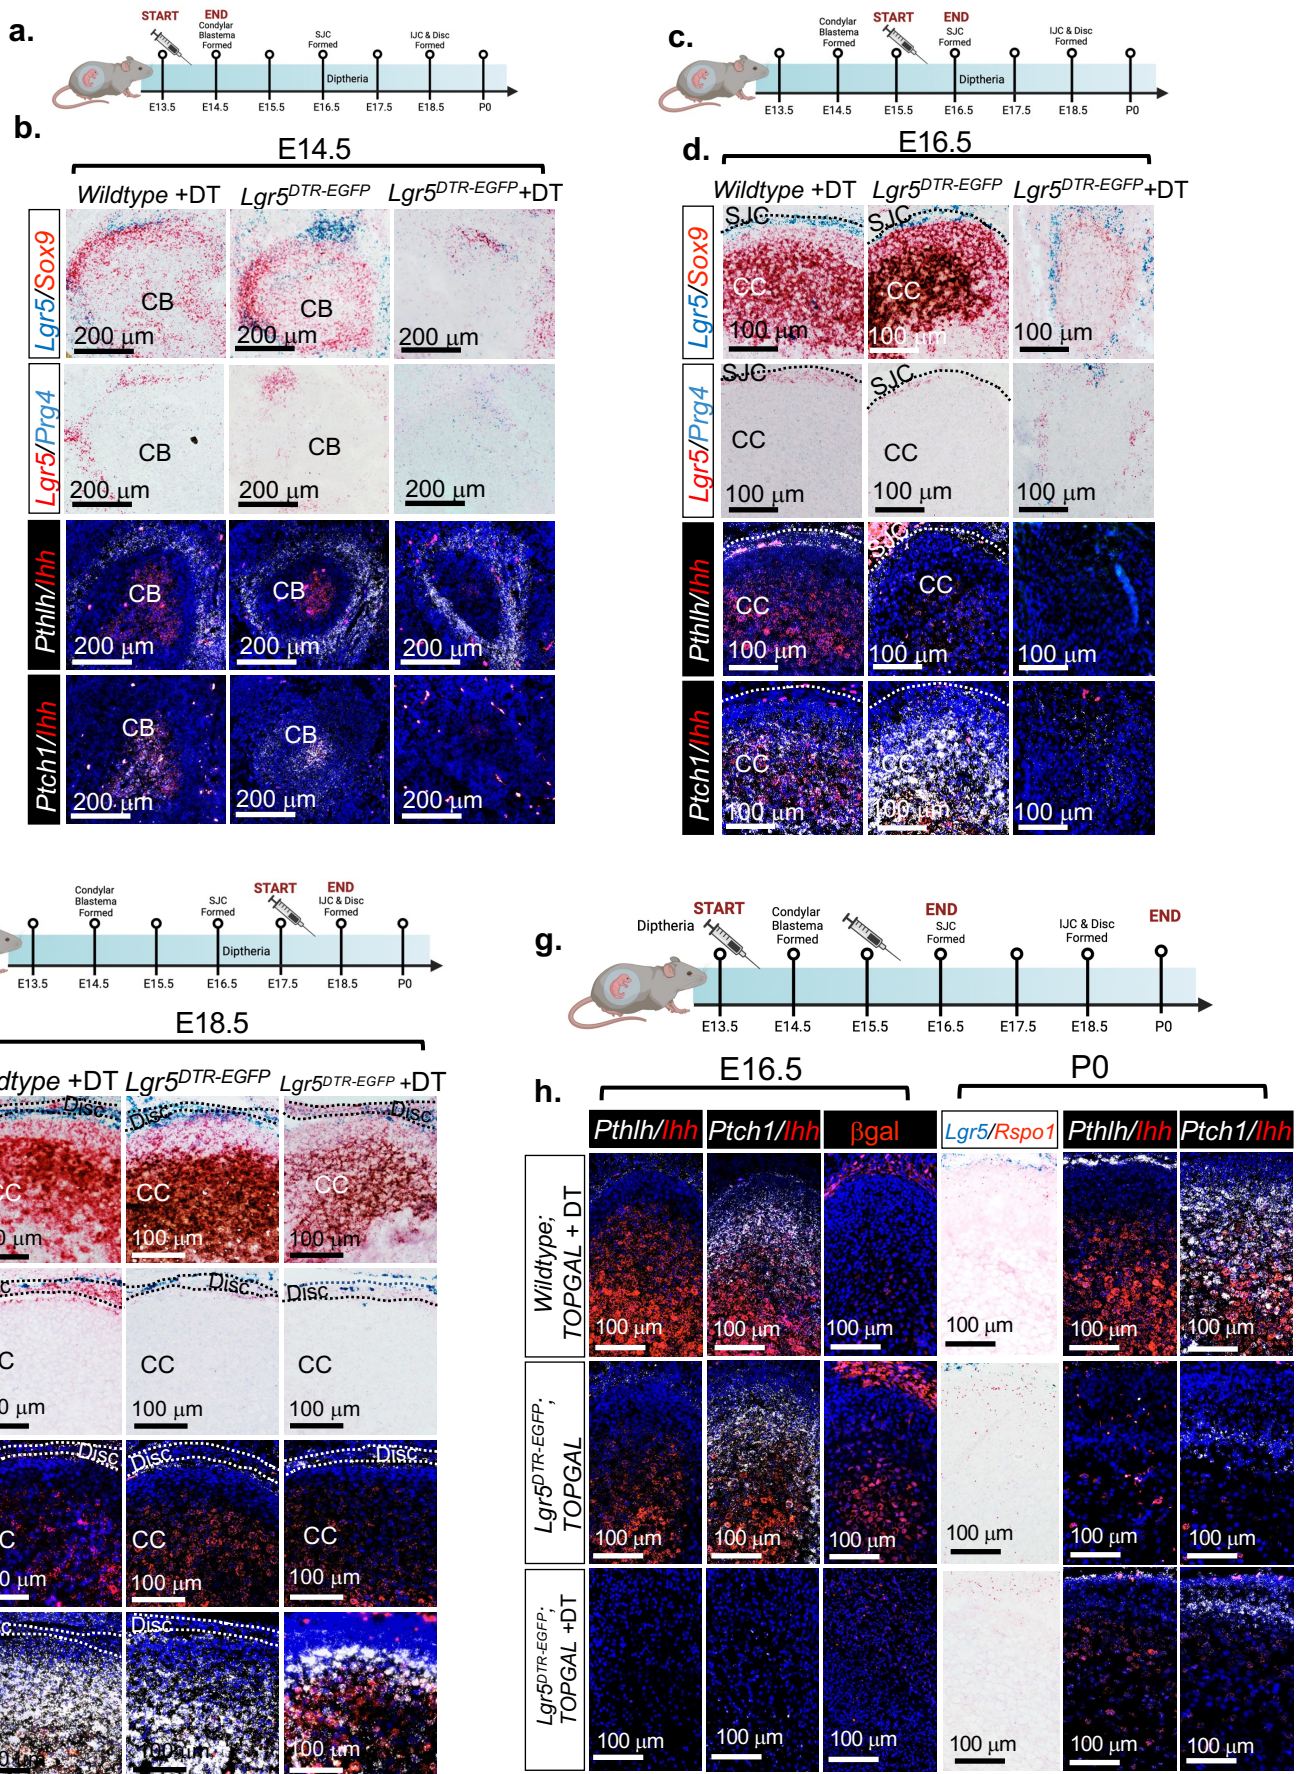

**Supplemental Figure 6. Ablation of *Lgr5*-expressing cells disrupts jaw joint**

**morphogenesis, related to Figure 4.** (a) Experimental timeline of diphtheria toxin

administration at E13.5 for 24 hours in *Lgr5*<sup>DTR-EGFP</sup> and Wildtype mice. SJC=superior joint

cavity; IJC=inferior joint cavity. (b) *in situ* hybridization of *Lgr5*, *SOX9*, *Prg4*, *Pthlh*, *Ptch1*, and

*Ihh* in E14.5 mice in a. CB=condylar blastema. (c) Experimental timeline of diphtheria toxin

administration at E15.5 for 24 hours in *Lgr5*<sup>DTR-EGFP</sup> and Wildtype mice. SJC=superior joint

cavity; IJC=inferior joint cavity. (d) *in situ* hybridization of *Lgr5*, *SOX9*, *Prg4*, *Pthlh*, *Ptch1*, and

*Ihh* in E16.5 mice in c. SJC= superior joint cavity, CC =mandibular condylar cartilage. (e)

Experimental timeline of diphtheria toxin administration at E17.5 for 24 hours in *Lgr5*<sup>DTR-EGFP</sup> and

Wildtype mice. SJC=superior joint cavity; IJC=inferior joint cavity. (f) *in situ* hybridization of *Lgr5*,

*SOX9*, *Prg4*, *Pthlh*, *Ptch1*, and *Ihh* in E18.5 mice in E. CC=mandibular condylar cartilage. (g)

Experimental timeline of diphtheria toxin administration at E13.5 and E15.5 in *Lgr5*<sup>DTR-</sup>

<sup>EGFP</sup>;Topgal and *Wt*;Topgal mice. Pups were analyzed at E16.5 and P0. (h) *in situ* hybridization

of *Pthlh*, *Ihh*, *Ptch1*, *Lgr5*, *Rspo1*, and immunohistochemistry of  $\beta$ -galactosidase ( $\beta$ Ggal) in

E16.5 and P0 pups from g.



**Supplemental Figure 7. Isolation of mini-pig TMJ primary cells and rheological properties of StemJEL™, related to Figure 5.**

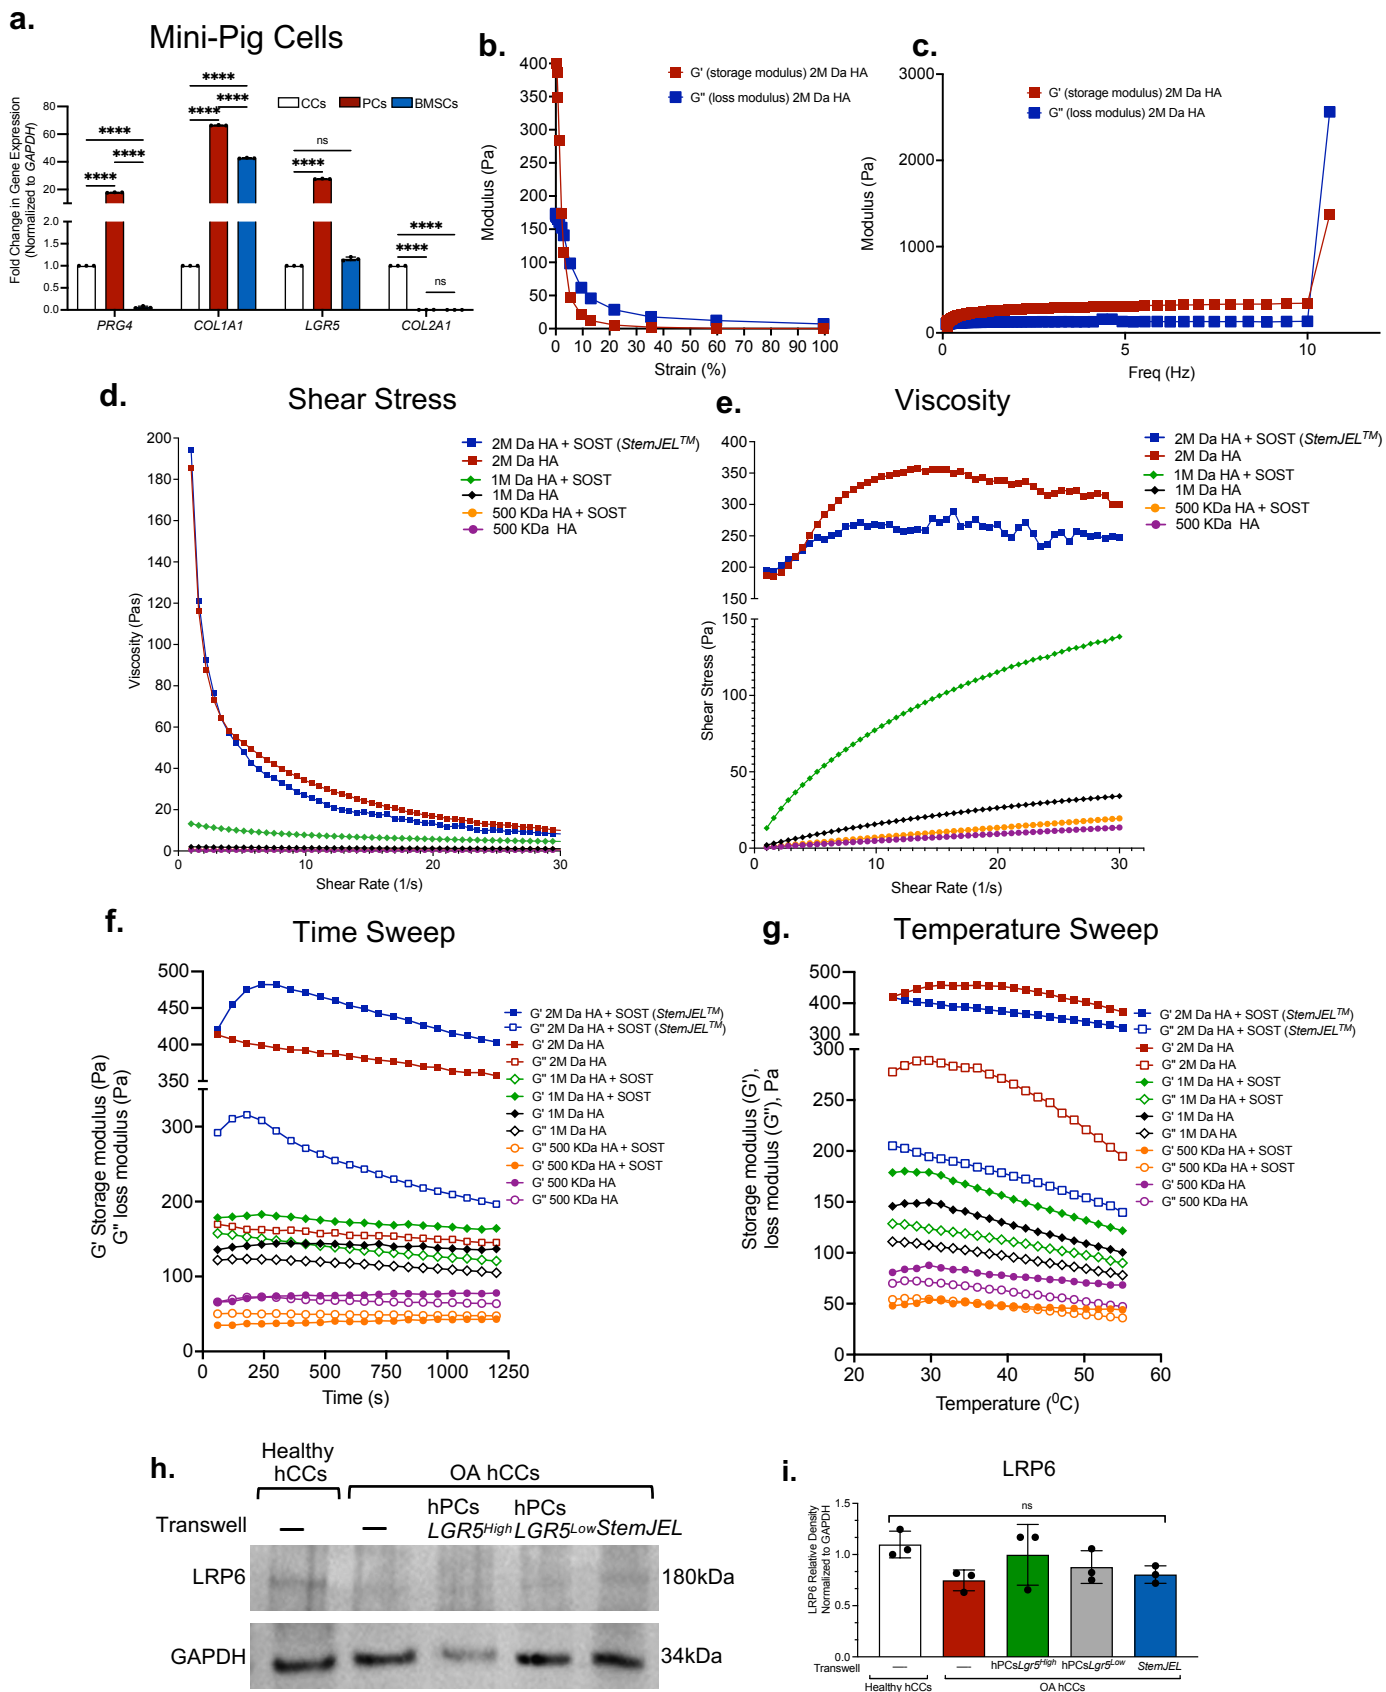

**Supplemental Figure 7. Isolation of mini-pig TMJ primary cells and rheological properties**

**of StemJEL™, related to Figure 5.** (a) qRT-PCR of mini-pig condylar cartilage cells (CCs), mini-pig perichondrial cells (PCs), and mini-pig bone marrow stromal stem cells (BMSCs). Data presented are mean fold change in gene expression  $\pm$  SD normalized to GAPDH.

\*\*\*\* $p \leq 0.0001$ ; two-way ANOVA followed by Tukey's post hoc; n=3 experiments. (b,c) Storage ( $G'$ ) and loss ( $G''$ ) moduli of 2 M Da HA was measured under strain (b) and frequency (c) sweep tests to determine the linear viscoelastic limit, where 1% strain and 10 Hz were selected. Shear stress (d) and viscosity (e) was measured as a function of shear rate. Storage ( $G'$ ) and loss moduli ( $G''$ ) of hydrogels was measured using time (f) and temperature (g) sweep tests. (h) Western blot of LRP6 hCCs cultured. (i) Quantification of western blot of LRP5 in hCCs in h. Data presented are mean density  $\pm$  SD normalized to GAPDH; one-way ANOVA followed by Tukey's post hoc; n=3 experiments.

## Supplemental Tables

Supplemental Table 1: Gene Ontology, related to Figure 1.

| Biological Process/Molecular Function                           | Gene Ontology |
|-----------------------------------------------------------------|---------------|
| ATP synthesis coupled electron transport                        | 0042773       |
| aerobic electron transport chain                                | 0019646       |
| mitochondrial ATP synthesis coupled electron transport          | 0042775       |
| oxidative phosphorylation                                       | 0006119       |
| respiratory electron transport chain                            | 0022904       |
| electron transport chain                                        | 0022900       |
| aerobic respiration                                             | 0009060       |
| mitochondrial electron transport, NADH to ubiquinone            | 0006120       |
| cellular respiration                                            | 0045333       |
| ATP metabolic process                                           | 0046034       |
| oxidoreduction-driven active transmembrane transporter activity | 0015453       |
| electron transfer activity                                      | 0009055       |
| cartilage development                                           | 0051216       |
| ossification                                                    | 0001503       |
| biomineral tissue development                                   | 0031214       |
| biomineralization                                               | 0110148       |
| regulation of ossification                                      | 0030278       |
| regulation of biomineral tissue development                     | 0070167       |
| regulation of biomineralization                                 | 0110149       |
| bone mineralization                                             | 0030282       |
| frizzled binding                                                | 0005109       |

Supplemental Table 2: Mice & PCR Primers for Genotyping, related to STAR Methods.

| Mouse                                            | Source                       | Direction           | Sequence                |
|--------------------------------------------------|------------------------------|---------------------|-------------------------|
| <i>Prg4</i> <sup>tm1Mawa</sup> /J                | Jackson Laboratory<br>025737 | Forward (Common)    | GGAAGGAGGGACAACACTGA    |
|                                                  |                              | Reverse (Wildtype)  | TTTGTTGCAGTAGTCTCTTTTCG |
|                                                  |                              | Reverse (Mutant)    | CCATGCTCCCCACTTTGCGT    |
| Tg (TCF/Lef1-lacZ) <sup>34Efu</sup> /J           | Jackson Laboratory<br>004623 | Forward (Transgene) | ATCCTCTGCATGGTCAGGTC    |
|                                                  |                              | Reverse (Transgene) | CGTGGCCTGATTCATTCC      |
|                                                  |                              | Forward (IPC)       | CAAATGTTGCTTGTCTGGTG    |
|                                                  |                              | Reverse (IPC)       | GTCAGTCGAGTGCACAGTTT    |
| Gt(ROSA) <sup>26Sortm9(CAG-tdTomato)Hze</sup> /J | Jackson Laboratory<br>007909 | Forward (Wildtype)  | AAGGGAGCTGCAGTGGAGTA    |
|                                                  |                              | Reverse (Wildtype)  | CCGAAAATCTGTGGGAAGTC    |
|                                                  |                              | Forward (Mutant)    | GGCATTAAAGCAGCGTATCC    |
|                                                  |                              | Reverse (Mutant)    | CTGTTCTGTACGGCATGG      |
| <i>Lgr5</i> <sup>DTR-EGFP</sup>                  | Genentech                    | Forward             | AAGTTCATCTGCACCACCG     |
|                                                  |                              | Reverse             | TCCTTGAAGAAGATGGTGCG    |
| <i>Lgr5</i> <sup>Ftm1(cre/ERT2)Cle</sup> /J      | Jackson Laboratory<br>008874 | Forward             | CCGGGCTGCCACGACCAA      |
|                                                  |                              | Reverse             | GGCGCGGCAACACCATTTTT    |
| CD1-IGS                                          | Charles River<br>022         |                     |                         |
|                                                  |                              |                     |                         |

Supplemental Table 3: Primary antibodies used for immunohistochemistry, related to STAR Methods.

| Primary Antibody           | Source/Catalogue #     | Dilution | Species           |
|----------------------------|------------------------|----------|-------------------|
| Mouse anti-Aggregan        | ThermoFisher MA3-16888 | 1:100    | Mouse, Pig        |
| Rabbit anti-βcatenin       | Abcam ab6302           | 1:100    | Mouse, Pig        |
| Rabbit anti-βgalactosidase | MBL PM049              | 1:100    | Mouse             |
| Rabbit anti-Collagen I     | Abcam ab34710          | 1:100    | Mouse             |
| Mouse anti-Collagen I      | Invitrogen ma1-26771   | 1:100    | Pig, Human        |
| Mouse anti-Collagen IIA    | Millipore MAB8887      | 1:100    | Mouse, Pig, Human |
| Rabbit anti-Osteocalcin    | EMD Millipore ab10911  | 1:100    | Mouse, Pig, Human |
| Goat anti-Periostin        | R&D Systems, af2955    | 1:100    | Mouse             |
| Rabbit anti-Runx2          | Abcam ab23981          | 1:100    | Mouse, Pig        |

Supplemental Table 4: Secondary antibodies used for immunohistochemistry & western blot, related to STAR Methods.

| Secondary Antibody                  | Source            | Dilution |
|-------------------------------------|-------------------|----------|
| Goat anti-mouse HRP                 | Invitrogen G21040 | 1:5000   |
| Goat anti-rabbit HRP                | Invitrogen G21234 | 1:5000   |
| Goat anti-rabbit Alexa Fluor 546    | Invitrogen A11010 | 1:2000   |
| Goat anti-rabbit Alexa Fluor 488    | Invitrogen A11008 | 1:1000   |
| Goat anti-mouse Alexa Fluor 546     | Invitrogen A11003 | 1:2000   |
| Goat anti-mouse Alexa Fluor 488     | Invitrogen A11001 | 1:1000   |
| Donkey anti- rabbit Alexa Fluor 647 | Invitrogen A32795 | 1:2000   |

Supplemental Table 5: qRT-PCR Primers, related to STAR Methods.

| Gene              | Direction | Sequence                      |
|-------------------|-----------|-------------------------------|
| <i>Ss GAPDH</i>   | Forward   | ATCCTGGGCTACACTGAGGAC         |
|                   | Reverse   | AAGTGGTCGTTGAGGGCAATG         |
| <i>Ss COL2a1</i>  | Forward   | GAGAGGTCTTCCTGGCAAAG          |
|                   | Reverse   | AAGTCCCTGGAAGCCAGAT           |
| <i>Ss LGR5</i>    | Forward   | CCTTGCCCTGAACAAAATA           |
|                   | Reverse   | ATTTCTTTCCCAGGGAGTGG          |
| <i>Ss WNT3A</i>   | Forward   | AGTACTCATCCCTGGGGACA          |
|                   | Reverse   | GGAAGTGGTGTGGCACTCT           |
| <i>Ss PRG4</i>    | Forward   | ACTGTGGAGAGGACTTCCGA          |
|                   | Reverse   | ACTTCTCACCTTTAGTCACCATT       |
| <i>Ss ACAN</i>    | Forward   | CCCACCTTTCTCCCTTCTATTC        |
|                   | Reverse   | TCTGGAAACCACTGCTTCTATT        |
| <i>Ss RUNX2</i>   | Forward   | GAGAGAGAGAGACAGAGAGAAAGA      |
|                   | Reverse   | GGAAAGACACAGAGGAGGTAAAG       |
| <i>Ss SOST</i>    | Forward   | AGCCAACACTTCTAGCACTTA         |
|                   | Reverse   | ACCTCTCTGTGCTTCCTATCT         |
| <i>Ss BGLAP</i>   | Forward   | ATGAAGGAAGAGGAGCAAAGAG        |
|                   | Reverse   | ACCACTAGGCTTTGCATCTG          |
| <i>Ss AXIN2</i>   | Forward   | GAG GGA GGA ATG CGT GGA TA    |
|                   | Reverse   | GGT TTC AGC TGC TTG GAG AC    |
| <i>Ss LEF1</i>    | Forward   | GGA AAG TGA CTT AGG CGA CA    |
|                   | Reverse   | CTT TCC GTC ATC AGG GTG TT    |
| <i>Ss MMP13</i>   | Forward   | GGA CCC AGG TGA AGC ATT TA    |
|                   | Reverse   | CCT GCT TCA GTC AAC TAT CTT T |
| <i>Ss ADAMTS4</i> | Forward   | CTC CTG GCT GAA TGG CTT ATA G |
|                   | Reverse   | CTC TCT CTC CCG TGT CTA TGT   |
| <i>Ss ADAMTS5</i> | Forward   | CTT GGG ACC ACC TCA ACA CC    |
|                   | Reverse   | GGG TCA TTG GTA AGG GTC AG    |
| <i>Ss COMP</i>    | Forward   | ACA GCG ACC AAG ACA AGT AAG   |

|                    |         |                                 |
|--------------------|---------|---------------------------------|
|                    | Reverse | GAG AGA CAA TGA GAC CTC AGA AAG |
| <i>Hs GAPDH</i>    | Forward | CATGAGAAGTATGACAACAGCCT         |
|                    | Reverse | AGTCCTTCCACGATACCAAAGT          |
| <i>Hs LGR5</i>     | Forward | AGTTACGTCTTGCGGGAAAC            |
|                    | Reverse | AGCTTCTGTGGGTACGTGTC            |
| <i>Hs BGLAP</i>    | Forward | TCACACTCCTCGCCCTATTG            |
|                    | Reverse | CTCTTCACTACCTCGCTGCC            |
| <i>Hs COL2a1</i>   | Forward | GCTCCTGCCGTTTCGCTG              |
|                    | Reverse | ATTATACCTCTGCCCATCCTGC          |
| <i>Hs ACAN</i>     | Forward | CTTCCGCTGGTCAGATGGAC            |
|                    | Reverse | CGTTTGTAGGTGGTGGCTGT            |
| <i>Hs ADAMTS-5</i> | Forward | CAAAGGCCTTCTGCGTTTAAG           |
|                    | Reverse | CAGTGCTGAATCCTCCAGTTA           |
| <i>Hs ADAMTS-4</i> | Forward | GCC CGC TTC ATA ACT GA          |
|                    | Reverse | CAA TGG AGC CTC TGG TTT GTC     |
| <i>Hs RUNX2</i>    | Forward | AGT AAG AAG AGC CAG GCA GGT     |
|                    | Reverse | TGG CTG GAT AGT GCA TTC GT      |
| <i>Mm Gapdh</i>    | Forward | GTGGAGATTGTTGCCATCAACGA         |
|                    | Reverse | CCCATTCTCGGCCTTGACTGT           |
| <i>Mm Lgr5</i>     | Forward | TCTTCTAGGAAGCAGAGGCG            |
|                    | Reverse | CAACCTCAGCGTCTTCACCT            |
| <i>Mm Bglap</i>    | Forward | ACACCATGAGGACCATCTTTC           |
|                    | Reverse | GAGACCTTCAGGAGGGTAGTT A         |
| <i>Mm Col2a1</i>   | Forward | GCAAGATGAGGGCTTCCATA            |
|                    | Reverse | CTACGGTGTCAGGGCCAG              |
| <i>Mm Dkk3</i>     | Forward | GTGATTGACAGGTGGTGTAGAG          |
|                    | Reverse | CAGGCAACAGAGGACAGAAA            |
| <i>Mm Sost</i>     | Forward | GAAAGACCTGGGACTGGTTATG          |
|                    | Reverse | TCAGGGTCAGAAACCCTATCT           |
| <i>Mm Prg4</i>     | Forward | GAAAATACTTCCCCTCTGCTTGT         |
|                    | Reverse | ACTCCATGTAGTGCTGACAGTTA         |
| <i>Mm Wnt3a</i>    | Forward | CACCACCGTCAGCAACAGCC            |
|                    | Reverse | AGGAGCGTGTCACTGCGAAAG           |
| <i>Mm Comp</i>     | Forward | GCG TAA CTC GGA CAG TGA TAA G   |
|                    | Reverse | GGC ATC CAG CTC TGT ATC TTT C   |
| <i>Mm Lrp4</i>     | Forward | GGCAAAAAGCAGGAACTTGT            |
|                    | Reverse | TCTACCCAGTGGCCAGAACT            |
| <i>Mm Lrp5</i>     | Forward | CTTCCACACACCATGCGAGG            |
|                    | Reverse | GTCAGACAGGTCATGTACTC            |
| <i>Mm Lrp6</i>     | Forward | CTGGATTATTGTCCCCGGAT            |
|                    | Reverse | GTGTGTATTCCAGTCAGTCC            |

Supplemental Table 6, related to STAR Methods: Primary antibodies used for western blot

| Primary Antibody                                  | Source/Catalogue #     | Dilution |
|---------------------------------------------------|------------------------|----------|
| Rabbit anti-total $\beta$ catenin                 | Invitrogen 71-2700     | 1:4000   |
| Rabbit anti-non-phospho (active)- $\beta$ catenin | Cell Signaling 8814    | 1:1000   |
| Rabbit anti-LRP5                                  | Proteintech 24899-1-AP | 1:1000   |
| Rabbit anti-LRP6                                  | Cell Signaling 3395    | 1:1000   |
| Mouse anti-CD44                                   | Proteintech 60224-1    | 1:5000   |
| Mouse anti-GAPH                                   | Invitrogen MA116757    | 1:2000   |

Supplemental Table S7: *in situ* Hybridization Probes

| Gene Probe        | Source/Catalogue # | Channel |
|-------------------|--------------------|---------|
| <i>Mm Lgr5</i>    | ACD/312171         | C1      |
| <i>Mm Col10a1</i> | ACD/426181         | C1      |
| <i>Mm Ihh</i>     | ACD/413091         | C1      |
| <i>Mm Sost</i>    | ACD/410031         | C1      |
| <i>Mm Prg4</i>    | ACD/437661         | C1      |
| <i>Mm Lgr5</i>    | ACD/312171         | C2      |
| <i>Mm Sox9</i>    | ACD/401051         | C2      |
| <i>Mm Ptch1</i>   | ACD/402811         | C2      |
| <i>Mm Lgr6</i>    | ACD/404961         | C2      |
| <i>Mm Col2a1</i>  | ACD/407221         | C2      |
| <i>Mm Rspo1</i>   | ACD/479591         | C2      |
| <i>Mm Runx2</i>   | ACD/414021         | C3      |
| <i>Mm Pthlh</i>   | ACD/456521         | C3      |
| <i>Mm Dkk3</i>    | ACD/400931         | C3      |
